# Supplementary material for: Nanoscale temperature sensing of electronic devices with calibrated scanning thermal microscopy
Source: Royal Society of Chemistry journal article supplement (doi:10.1039/d3nr00343d), 2023-01-01

**Figure S1**

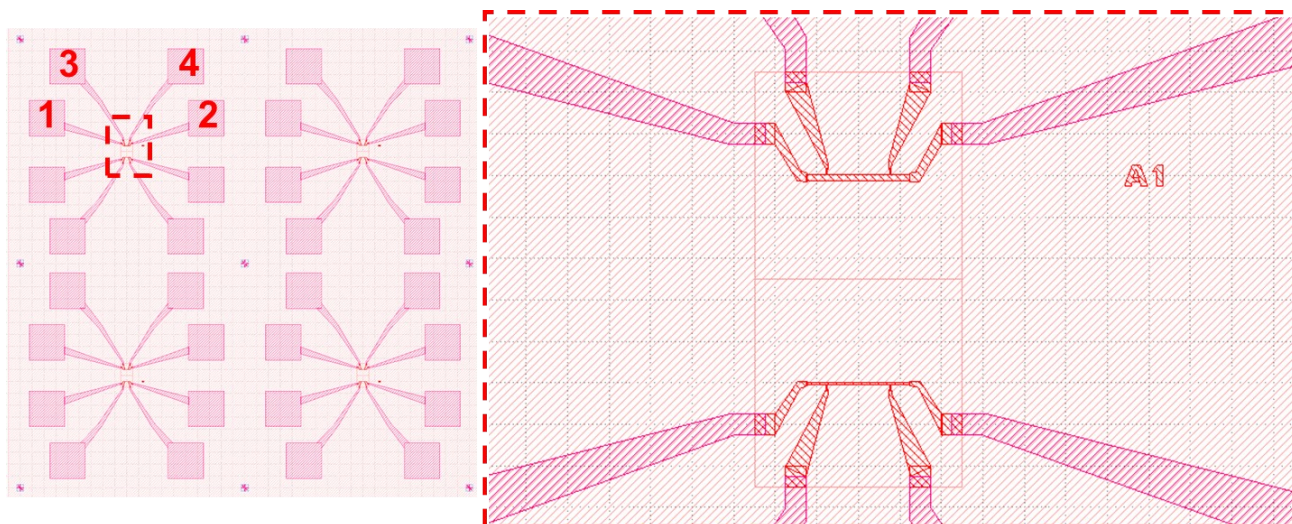

Figure S2

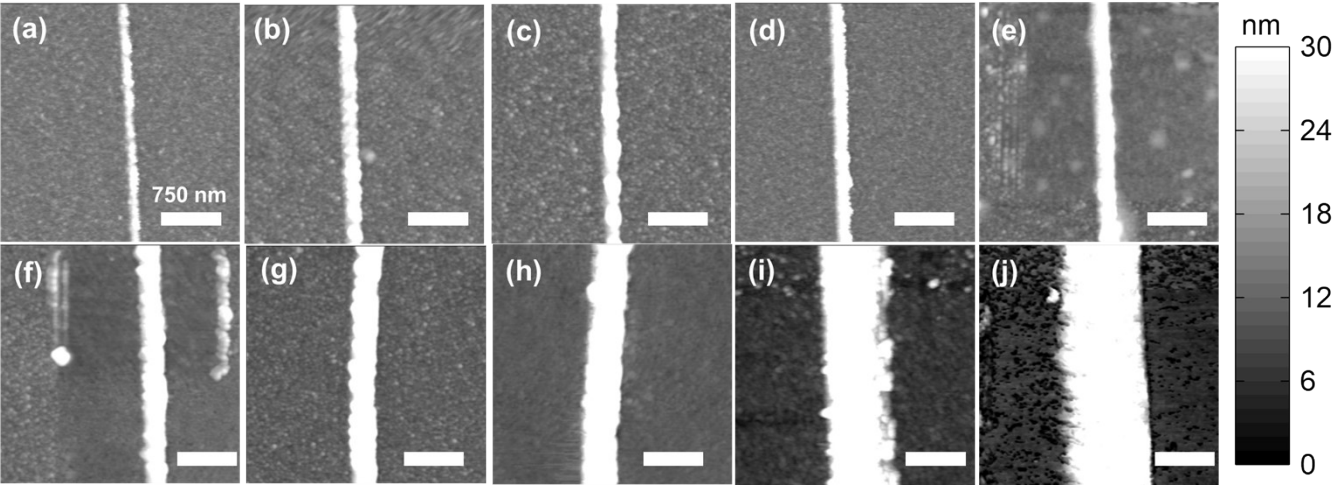

Figure S3

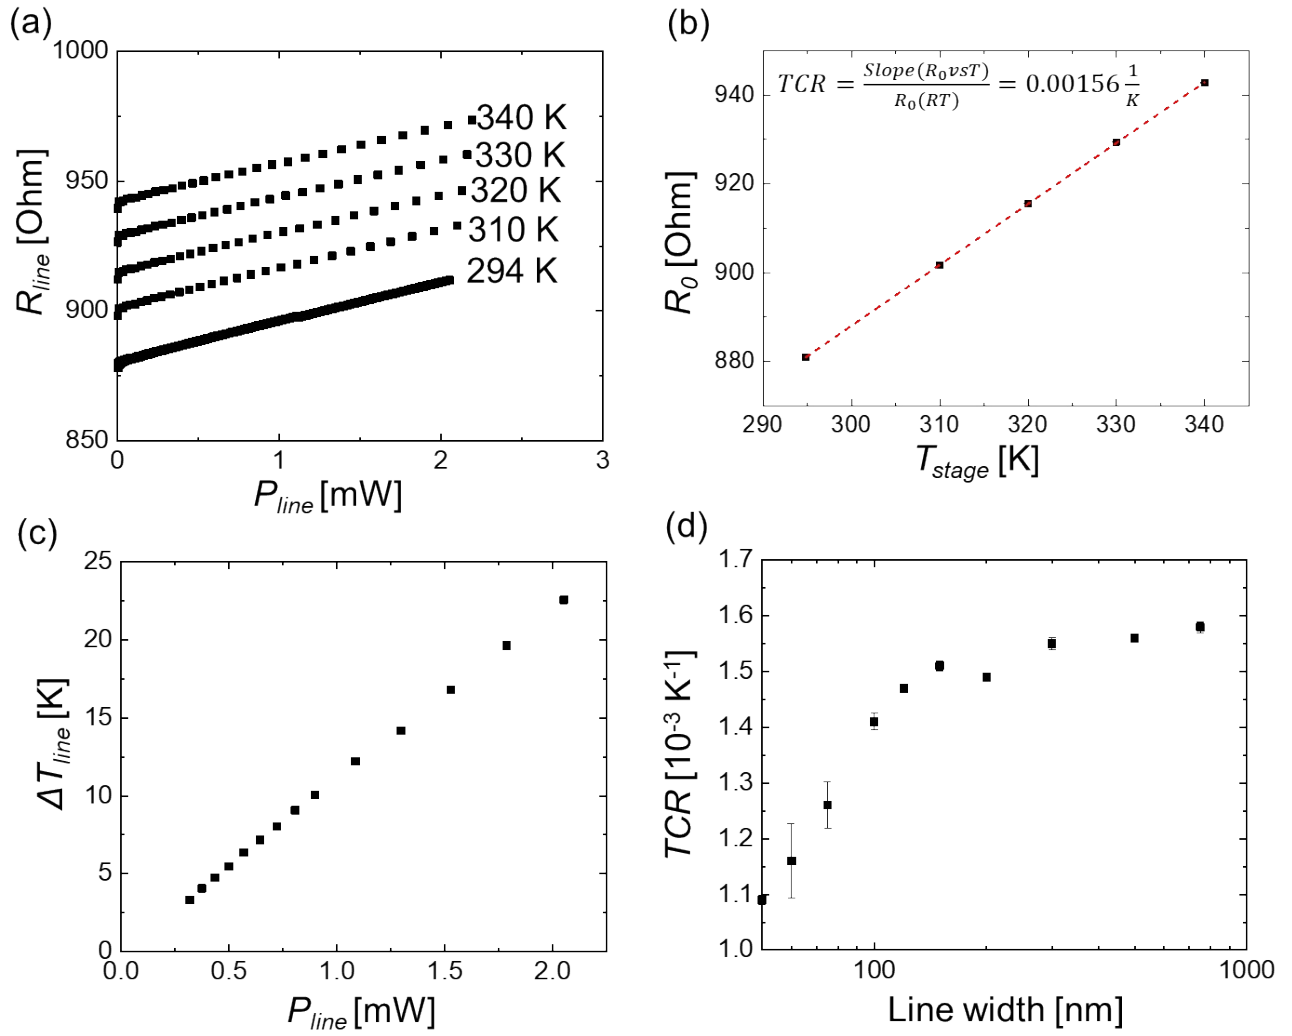

Figure S4

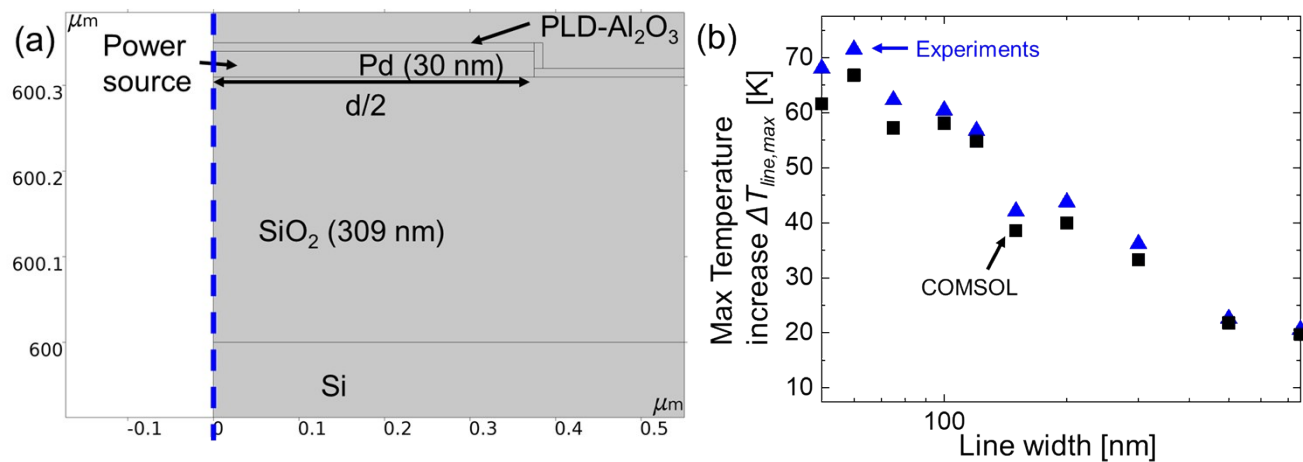

Figure S5

(a) Wheatstone Bridge

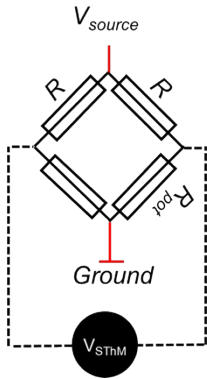

(b)

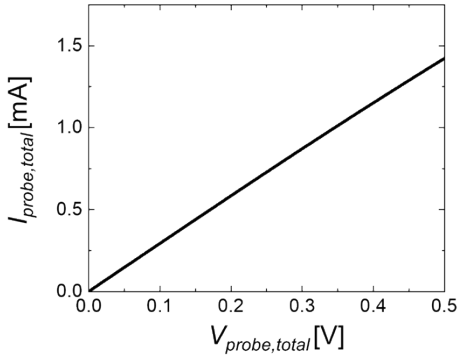

(c)

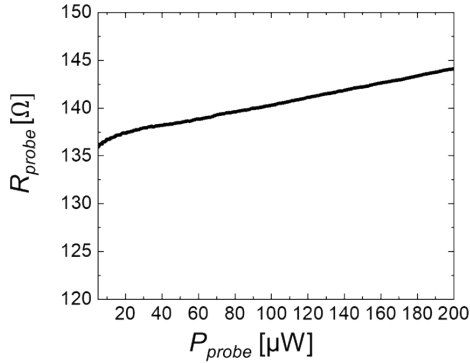

Figure S6

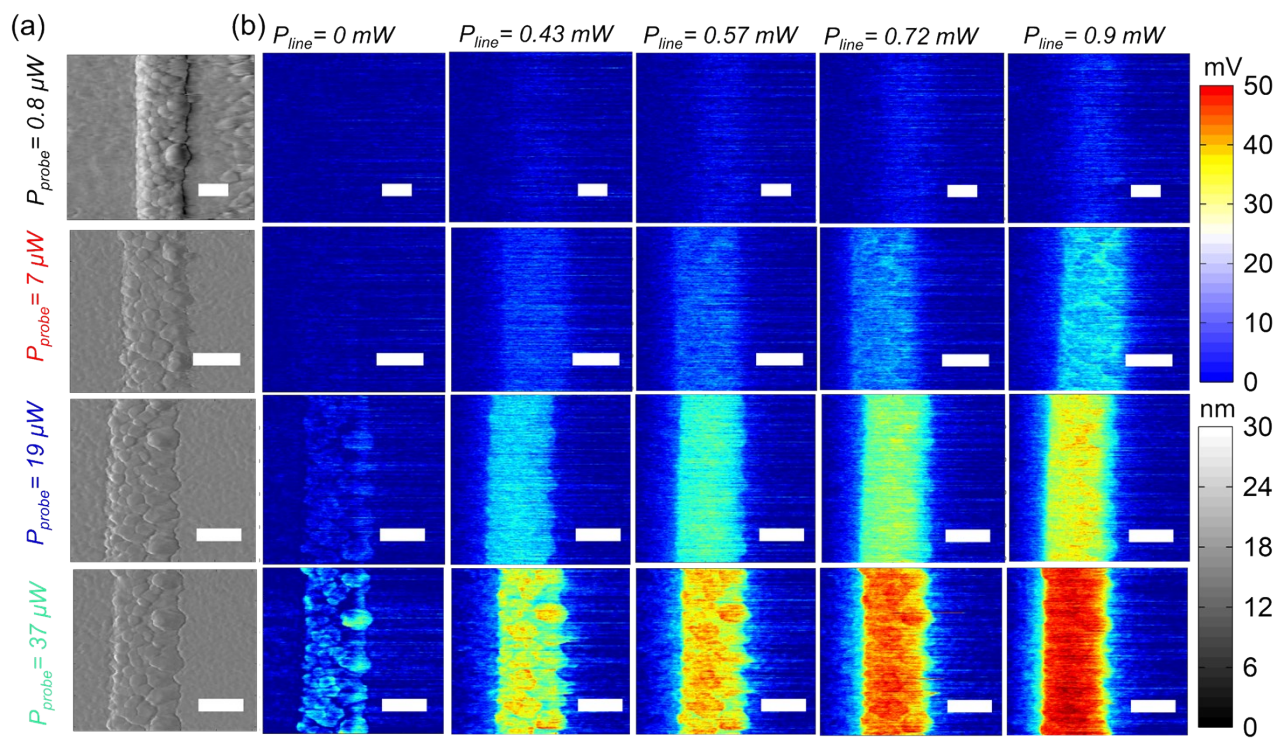

Figure S7

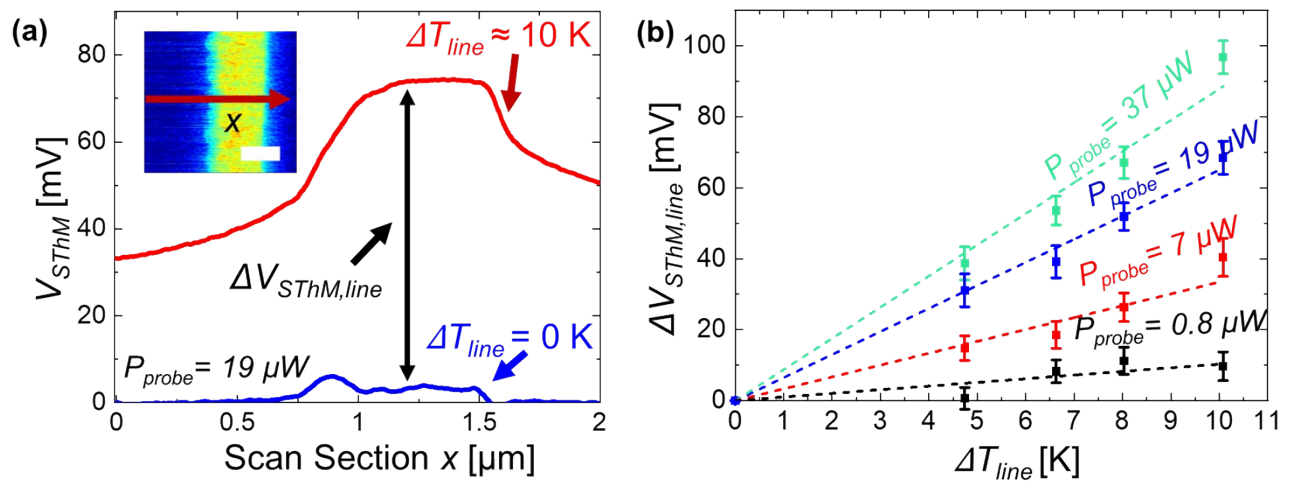

Figure S8

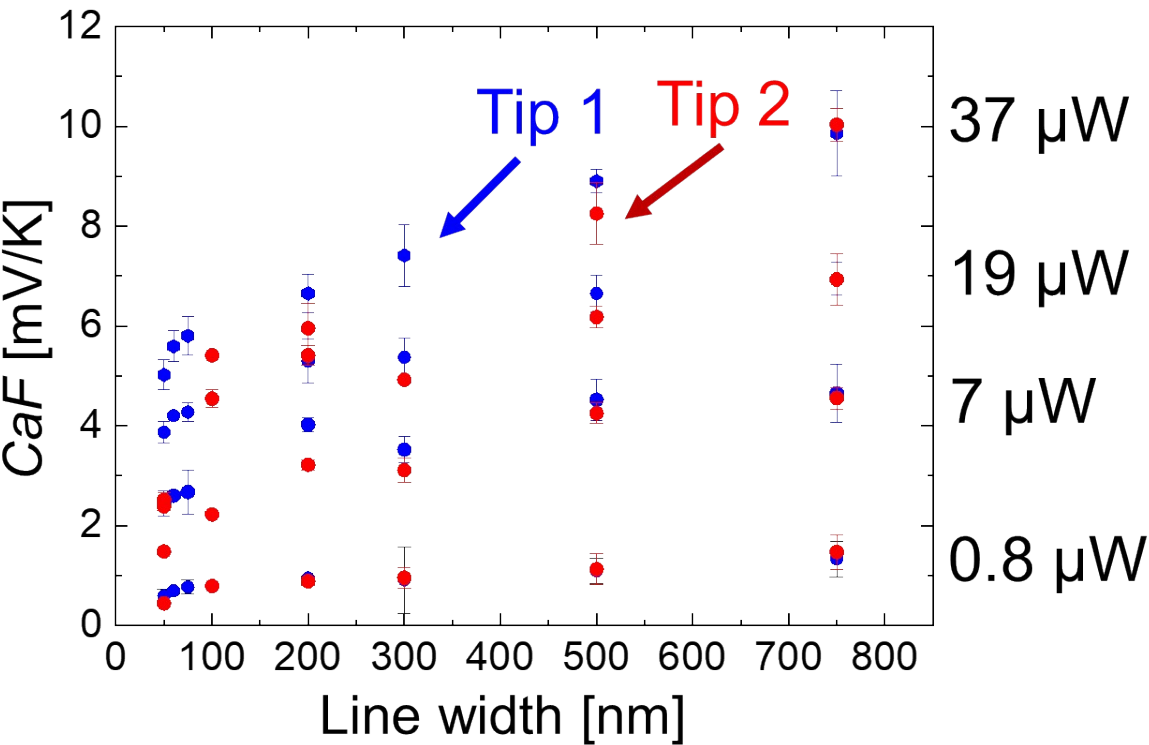



Figure S9

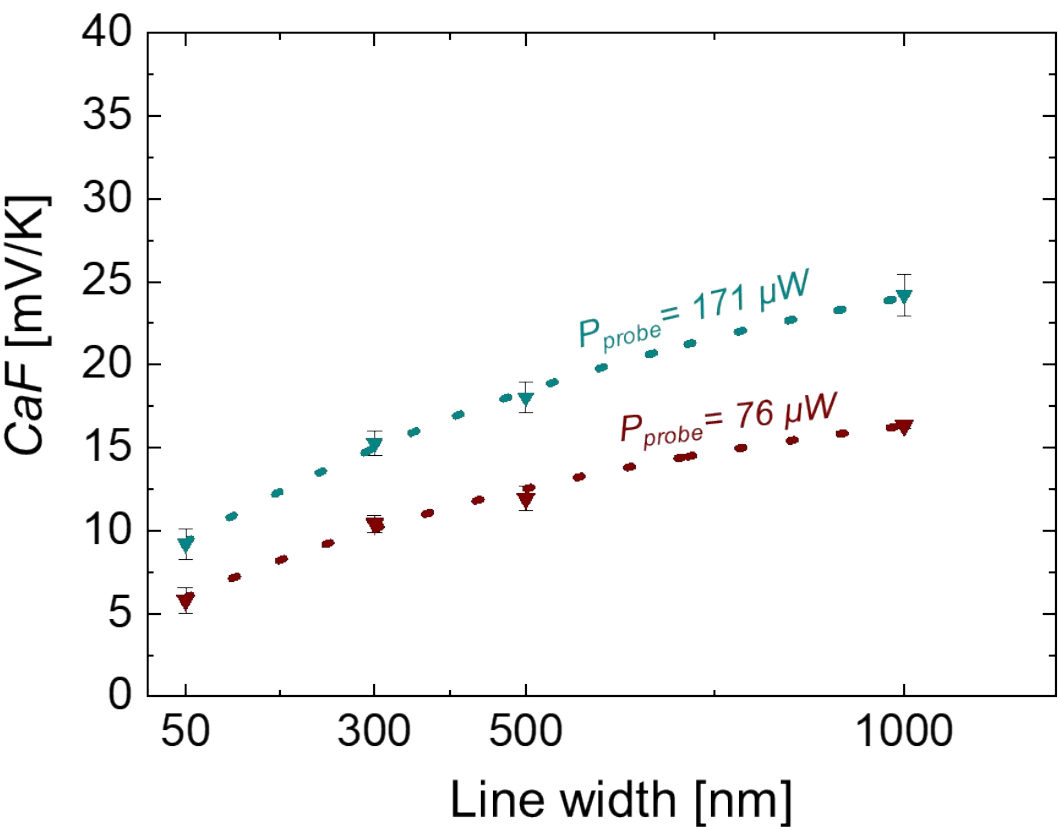

**Figure S10**

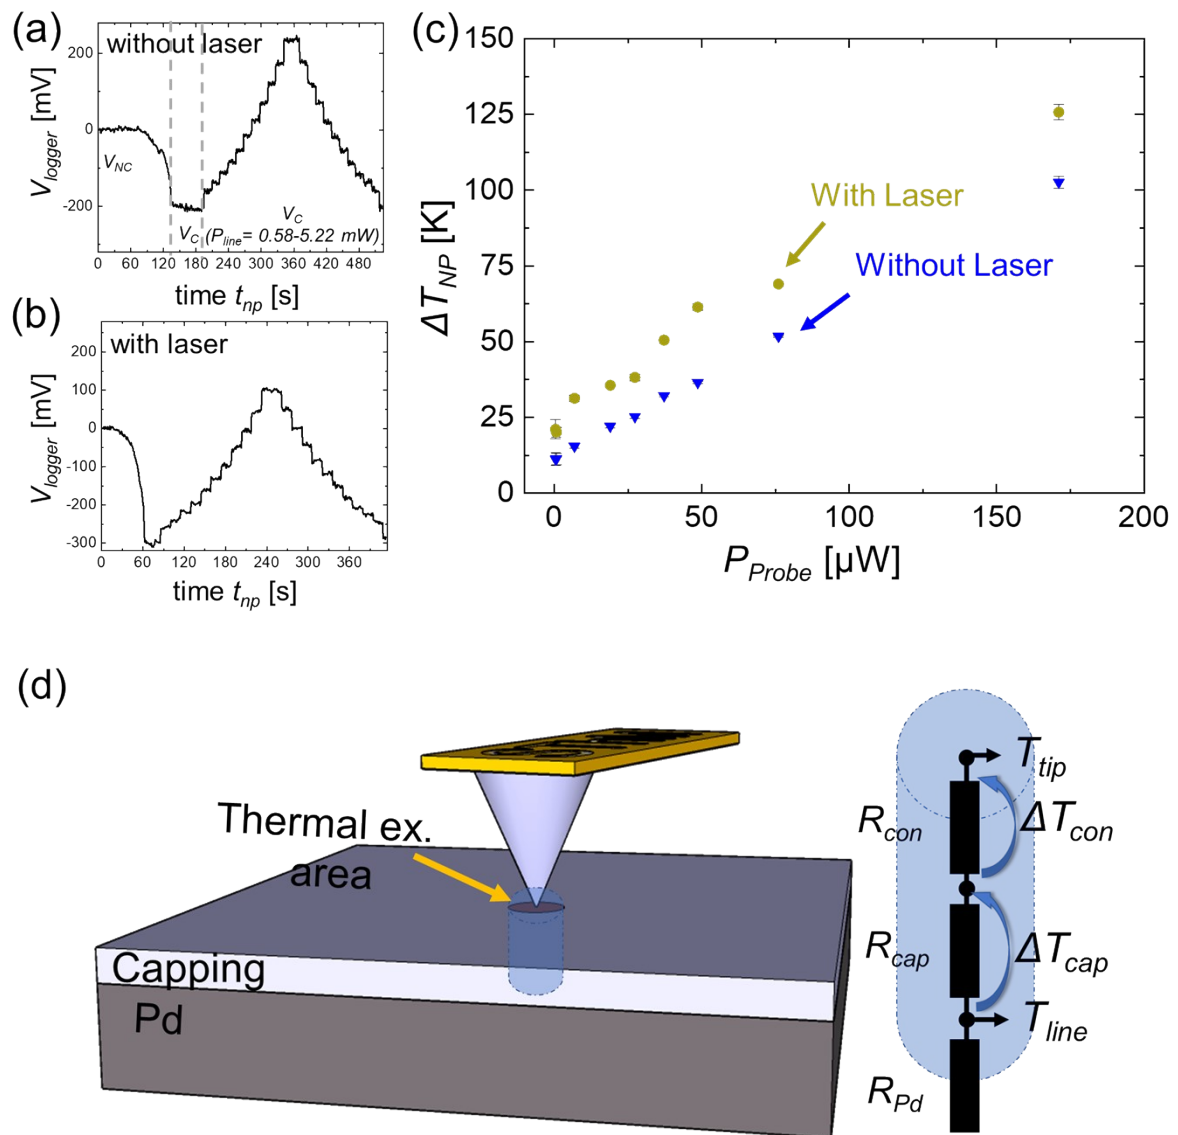

Supplement: d3nr00343d1.pdf [file d3nr00343d1.pdf]
